# Supplementary material
Source: publisher site journal article supplement (http://www.sagepub.com/upm-data/37902_AOSSM_Hip_Arthroscopy_Supplement_CFP.pdf)
Supplement: Supplementary file 1 [file 37902_AOSSM_Hip_Arthroscopy_Supplement_CFP.pdf]

The American Journal of  
**Sports  
Medicine**

The Official Journal of the American  
Orthopaedic Society for Sports Medicine

Bruce Reider, MD, Editor-in-Chief

## Call for Papers

Special *AJSM* supplement on  
Hip Arthroscopy

---

### Guest Editors

Marc R. Safran, MD, *AJSM* Editorial Board Member

Mark R. Hutchinson, MD, *AJSM* Editorial Board Member

# Hip Arthroscopy Supplement

*The American Journal of Sports Medicine (AJSM)*, with the support of  
ConMed Linvatec, is producing a special supplement in the summer of 2011  
that will include original clinical and laboratory research on hip arthroscopy.

- *Deadline for manuscript submission is February 28, 2011*
- *Supplement will include approximately 16 articles*
- *Early submission is encouraged*

**Don't miss out on this  
exciting opportunity.**

**Submit your manuscript today at:**  
<http://ajsm-submit.highwire.org>

Supported by

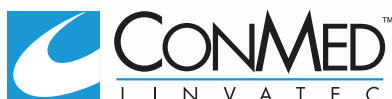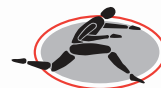

The American Orthopaedic  
Society for Sports Medicine

6300 N. River Road, Suite 500  
Rosemont, IL 60018  
P: 847/653-8000  
F: 847/653-8001  
E: [ajsm@ajsm.org](mailto:ajsm@ajsm.org)

[www.ajsm.org](http://www.ajsm.org)
